# Supplementary material
Source: HighWire-hosted journal article supplement (https://www.rcpjournals.org/highwire/filestream/10046/field_highwire_adjunct_files/0/CMJ1404OConnorAppendix.pdf)
Supplement: CMJ1404OConnorAppendix.pdf [file CMJ1404OConnorAppendix.pdf]

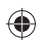

### Appendix 1. The case Conference Assessment Tool

|                          |                              |                                     |                              |
|--------------------------|------------------------------|-------------------------------------|------------------------------|
| <b>Trainee's name:</b>   | <input type="text"/>         | <b>Trainee's GMC number:</b>        | <input type="text"/>         |
| <b>Assessor's name:</b>  | <input type="text"/>         | <b>Assessor's GMC number:</b>       | <input type="text"/>         |
| <b>Assessment date:</b>  | <input type="text"/>         |                                     | <b>Assessor grade:</b>       |
| <b>Year of training:</b> | ST1 <input type="checkbox"/> | ST2 <input type="checkbox"/>        | ST3 <input type="checkbox"/> |
|                          | ST4 <input type="checkbox"/> | ST5 <input type="checkbox"/>        | ST6 <input type="checkbox"/> |
|                          | ST7 <input type="checkbox"/> |                                     |                              |
|                          |                              | Consultant <input type="checkbox"/> |                              |
|                          |                              | SAS <input type="checkbox"/>        |                              |
|                          |                              | SpR/StR <input type="checkbox"/>    |                              |
|                          |                              | GP <input type="checkbox"/>         |                              |
|                          |                              | Other <input type="checkbox"/>      |                              |

**Brief description of the activity being assessed**

**Complexity of case conference**      Low       Average       High

**Trainee's reflections on their performance during this activity**

**Which aspects of the encounter were done well? Please note any areas of excellent performance**

**Suggested areas for improvement? Please also note any causes for concern**

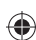

Please rate the trainee according to whether they performed at the level expected

| At end of Foundation/in early CMT                                                  | At end of CMT            | During early higher training | Mid-point of higher training | CCT/end of higher training | Unable to comment        | Cause for concern        |
|------------------------------------------------------------------------------------|--------------------------|------------------------------|------------------------------|----------------------------|--------------------------|--------------------------|
| <b>Setting the scene, introductions and agenda</b>                                 |                          |                              |                              |                            |                          |                          |
| <input type="checkbox"/>                                                           | <input type="checkbox"/> | <input type="checkbox"/>     | <input type="checkbox"/>     | <input type="checkbox"/>   | <input type="checkbox"/> | <input type="checkbox"/> |
| Comments                                                                           |                          |                              |                              |                            |                          |                          |
| <b>Multidisciplinary teamwork and facilitation of team members</b>                 |                          |                              |                              |                            |                          |                          |
| <input type="checkbox"/>                                                           | <input type="checkbox"/> | <input type="checkbox"/>     | <input type="checkbox"/>     | <input type="checkbox"/>   | <input type="checkbox"/> | <input type="checkbox"/> |
| Comments                                                                           |                          |                              |                              |                            |                          |                          |
| <b>Evidence of listening skills</b>                                                |                          |                              |                              |                            |                          |                          |
| <input type="checkbox"/>                                                           | <input type="checkbox"/> | <input type="checkbox"/>     | <input type="checkbox"/>     | <input type="checkbox"/>   | <input type="checkbox"/> | <input type="checkbox"/> |
| Comments                                                                           |                          |                              |                              |                            |                          |                          |
| <b>Clarity of explanations to patient and family</b>                               |                          |                              |                              |                            |                          |                          |
| <input type="checkbox"/>                                                           | <input type="checkbox"/> | <input type="checkbox"/>     | <input type="checkbox"/>     | <input type="checkbox"/>   | <input type="checkbox"/> | <input type="checkbox"/> |
| Comments                                                                           |                          |                              |                              |                            |                          |                          |
| <b>Problem-solving skills</b>                                                      |                          |                              |                              |                            |                          |                          |
| <input type="checkbox"/>                                                           | <input type="checkbox"/> | <input type="checkbox"/>     | <input type="checkbox"/>     | <input type="checkbox"/>   | <input type="checkbox"/> | <input type="checkbox"/> |
| Comments                                                                           |                          |                              |                              |                            |                          |                          |
| <b>Dealing with uncertainty, conflict or ethical issues</b>                        |                          |                              |                              |                            |                          |                          |
| <input type="checkbox"/>                                                           | <input type="checkbox"/> | <input type="checkbox"/>     | <input type="checkbox"/>     | <input type="checkbox"/>   | <input type="checkbox"/> | <input type="checkbox"/> |
| Comments                                                                           |                          |                              |                              |                            |                          |                          |
| <b>Ability to sum up agreed actions (and production of minutes if appropriate)</b> |                          |                              |                              |                            |                          |                          |
| <input type="checkbox"/>                                                           | <input type="checkbox"/> | <input type="checkbox"/>     | <input type="checkbox"/>     | <input type="checkbox"/>   | <input type="checkbox"/> | <input type="checkbox"/> |
| Comments                                                                           |                          |                              |                              |                            |                          |                          |

**Agreed actions**

**Trainee's Signature**

**Assessor's Signature**

## Appendix 2. Guidance for the case Conference Assessment Tool (cCAT)

The cCAT is designed to allow assessment of the performance of a trainee in a case conference with a patient and his or her family and carers and the multidisciplinary team. Please rate the trainee's performance on actual behaviour and not on any other factor. The assessment is based on direct observation of the case conference by the assessor (eg clinical or educational supervisor). Senior members of the multidisciplinary team may also complete the cCAT, provided that they have been trained in its use.

### Instructions

- > Agree in advance which case conference will be assessed.
- > Please score the trainee on the scale shown for the seven competency areas and record brief comments if appropriate; each area should be relevant to every assessment.
- > Discuss the trainee's performance, allowing the trainee to reflect first on how the case conference was conducted.
- > Please give feedback to the trainee after the assessment about what went well, recognising any areas of excellence and what could be improved – especially where deficiencies have been identified.
- > Agree an action plan for the trainee to improve on his or her performance.

### Descriptors of competencies demonstrated during case conferences

|                                                                                    |                                                                                                                                                                                                                                                                                                                              |
|------------------------------------------------------------------------------------|------------------------------------------------------------------------------------------------------------------------------------------------------------------------------------------------------------------------------------------------------------------------------------------------------------------------------|
| <b>Setting the scene, introductions and agenda</b>                                 | Appears well prepared for the meeting. Encourages participants to introduce themselves by name and title. Clearly identifies the purpose and objectives of the meeting.                                                                                                                                                      |
| <b>Multidisciplinary teamwork and facilitation of team members</b>                 | Values and acknowledges the contribution and expertise of each team member. Ensures that each team and family member has an opportunity to speak. Does not interrupt or speak over colleagues. Ensures full participation of reticent team members. Directs questions from family and carers to team members as appropriate. |
| <b>Evidence of listening skills</b>                                                | Demonstrates appropriate communication skills. Uses active listening with colleagues, patient and family. Recognises body language signals from all participants.                                                                                                                                                            |
| <b>Clarity of explanations to patient and family</b>                               | Provides patient and family/carer with information appropriate to the level of understanding. Where appropriate, sensitively explains language used by less-experienced multidisciplinary team (MDT) colleagues.                                                                                                             |
| <b>Problem-solving skills</b>                                                      | Identifies problems that may impede rehabilitation, discharge planning, etc. Applies creative thinking approaches to propose solutions to issues. Influences others to adopt change.                                                                                                                                         |
| <b>Dealing with uncertainty, conflict or ethical issues</b>                        | Recognises issues that present practical, moral or ethical problems to the MDT or the patient and family/carer. Promotes open discussion of the issues. Mediates appropriate solutions that satisfy all participants. Remains within relevant clinical and ethical guidelines.                                               |
| <b>Ability to sum up agreed actions (and production of minutes if appropriate)</b> | Accurately represents the opinions and plans of all participants of the conference. Checks understanding of outcome of all participants. (If appropriate, prepares an accurate set of minutes in a timely fashion).                                                                                                          |

| Matrix of competencies identified during training                         |                                                                         |                                                                                                                          |                                                                                                                |
|---------------------------------------------------------------------------|-------------------------------------------------------------------------|--------------------------------------------------------------------------------------------------------------------------|----------------------------------------------------------------------------------------------------------------|
|                                                                           | At end of foundation<br><i>Contributes to case conference</i>           | At end of core medical training<br><i>May lead case conference</i>                                                       | At end of training (CCT award)<br><i>Leads conference expertly</i>                                             |
| <b>Setting the scene, introductions and agenda</b>                        | Introduced self correctly and contributed to meeting                    | Ensured that all participants are introduced and welcomed; set out agenda for meeting                                    | Exemplary preparation with a clear agenda and purpose for the meeting                                          |
| <b>Multidisciplinary teamwork and facilitation of team members</b>        | Recognised roles of team members in the rehabilitation process          | Encouraged all team members to participate appropriately                                                                 | Appeared fully briefed about each team member's contribution; substituted for absent team members              |
| <b>Evidence of listening skills</b>                                       | Listened to proceedings and contributed at appropriate intervals        | Actively listened to all participants                                                                                    | Had full understanding of everything said and unsaid during the case conference                                |
| <b>Clarity of explanations to patient and family</b>                      | Succinctly presented medical information, avoiding the use of jargon    | Clearly explained medical issues, answered questions from patients and family with awareness of limitations of knowledge | Full command of all information, not just medical; included discussion of prognosis                            |
| <b>Problem-solving skills</b>                                             | Identified medical issues and dealt with simple issues                  | Handled straightforward medical problems arising from the case conference                                                | Led on finding creative solutions to problems                                                                  |
| <b>Deals with uncertainty, conflict or ethical issues</b>                 | Recognised practical, moral or ethical issues                           | Identified issues during case conference and sought resolution                                                           | Dealt with ethical and moral issues confidently; was able to handle issues regarding uncertainty of prognosis  |
| <b>Able to sum up agreed actions (and produce minutes if appropriate)</b> | Summarised medical jobs at end of meeting (for minutes, as appropriate) | Accurately described medical plan at end of meeting that links with other team members' contributions                    | Full and accurate summary (and minutes) of actions from meeting comprising contributions from all team members |
